# Supplementary material
Source: MDPI journal article supplement (https://www.mdpi.com/search?q=polymers-11-01840)
Supplement: s001 [file polymers-11-01840-s001.pdf]

# 1 **Supplementary Material for: Dominant Effects of** 2 **Short-Chain Branching on the Initial Stage of** 3 **Nucleation and Formation of Tie Chains for** 4 **Bimodal Polyethylene as Revealed by Molecular** 5 **Dynamics Simulation**

6 **Yanling Hu**<sup>1</sup>, **Yunqi Shao**<sup>1</sup>, **Zhen Liu**<sup>1</sup>, **Xuelian He**<sup>1,\*</sup> and **Boping Liu**<sup>2,\*</sup>

7 <sup>1</sup> Shanghai Key Laboratory of Multiphase Material Chemical Engineering, East China University of  
8 Science and Technology, Shanghai 200237, China; [huyyl@mail.ecust.edu.cn](mailto:huyyl@mail.ecust.edu.cn) (Y.H.);  
9 [yunqi\\_shao@mail.ecust.edu.cn](mailto:yunqi_shao@mail.ecust.edu.cn) (Y.S.); [liuzhen@ecust.edu.cn](mailto:liuzhen@ecust.edu.cn) (Z.L.)

10 <sup>2</sup> College of Materials and Energy, South China Agricultural University, Guangzhou 510642, China;  
11 [boping@scau.edu.cn](mailto:boping@scau.edu.cn)

12 \* Correspondence: [hexl@ecust.edu.cn](mailto:hexl@ecust.edu.cn) (X.H.); [boping@scau.edu.cn](mailto:boping@scau.edu.cn) (B.L.)

13 Received: 9 October 2019; Accepted: 5 November 2019; Published: date

## 14 **1. Effect of the Box Size on the Crystallinity of Complex BPE Model**

15 Fig. S1 shows the box size dependence of crystallinity ( $X_c$ ) for HDPE model in Table 1 in the  
16 manuscript.  $l_e^*$  is the normalized distance from the end of the polymer chain to the closest edge  
17 of the box. As observed, the value of  $X_c$  for HDPE model increased with the increase of the  
18 normalized distance  $l_e^*$ , up to about  $6\sigma$ . Above  $6\sigma$ , the value of  $X_c$  for HDPE model was almost  
19 stable at around 0.45. So in this paper, we chose the value of  $l_e^*$  as  $25\sigma$  to eliminate the effect of  
20 box size on the crystallinity of all the models. Note that the side length of the box was much  
21 larger than the normalized distance  $l_e^*$  (when  $l_e^*$  was set at about  $25\sigma$ , the corresponding side  
22 length of the box was about  $1100\sigma$ ).

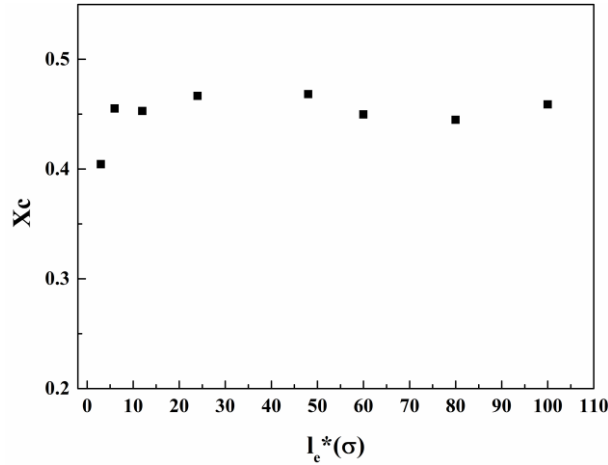

23

24 **Figure S1.** Box size dependence of crystallinity ( $X_c$ ) for HDPE model in Table 1 in the manuscript.  $l_c^*$  is

25 the normalized distance from the end of the polymer chain to the closest edge of the box.

## 26 **2. Comparison between Simulation Temperature and Real Experimental Temperature**

27 In order to make a rough comparison with the real experimental melting

28 temperature of BPE, we calculated the melting temperature of HDPE model

29 (non-branched complex BPE model) in Table 1. The final semicrystalline state

30 (state of the end of the simulation) of this model was then melted by heating it

31 from  $T^* = 3.0 - 8.0$  at a same heating rate  $\Gamma^* = 2.5 \times 10^{-4} \tau^{-1}$ , and the melting

32 temperature of this model was  $T_m^* = 7.5$ . The corresponding experimental

33 melting temperatures for BPE are in a range of 132 - 137 °C [1]. High simulation

34 temperature  $T^* = 8.0$  was corresponding to the real experimental temperature

35 which was higher than the melting temperature of BPE.

36

## 37 **3. References**

38 1. Krishnaswamy, R.K.; Yang, Q.; Fernandez-Ballester, L.; Kornfield, J.A.

39 Effect of the distribution of short-chain branches on crystallization kinetics  
40 and mechanical properties of high-density polyethylene. *Macromolecules*  
41 **2008**, *41*, 1693-1704.

42

43

44

45

46

47

#### 48 Other Figures and Tables

49 **Table S1.** Methylene sequence length (MSL) of the complex BPE model chains and the simple BPE  
50 model chains

51

| Branch Content<br>(SCB/1000 backbone carbons) | Methylene Sequence Length (MSL)/CH <sub>2</sub> |        |       |       |
|-----------------------------------------------|-------------------------------------------------|--------|-------|-------|
|                                               | Lb/10S                                          | L/10Sb | Lb/1S | L/1Sb |
| 1                                             | 476                                             | 334    | 1000  | 100   |
| 2                                             | 244                                             | 200    | 500   | 50    |
| 3                                             | 164                                             | 142    | 332   | 34    |
| 4                                             | 124                                             | 112    | 250   | 26    |
| 5                                             | 100                                             | 92     | 200   | 20    |
| 6                                             | 82                                              | 76     | 166   | 16    |
| 7                                             | 70                                              | 66     | 142   | 14    |
| 8                                             | 62                                              | 58     | 124   | 12    |

52

53

54

55

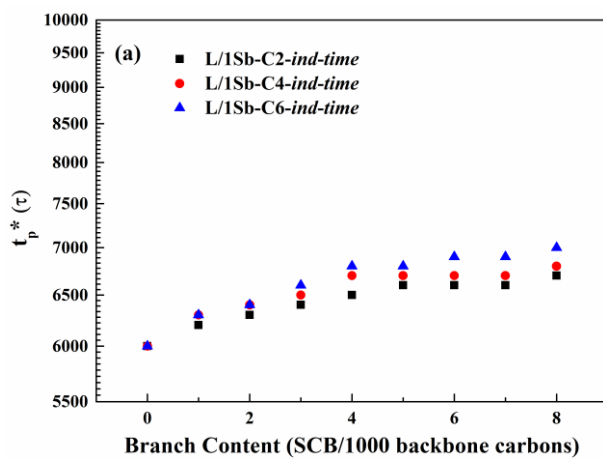

56

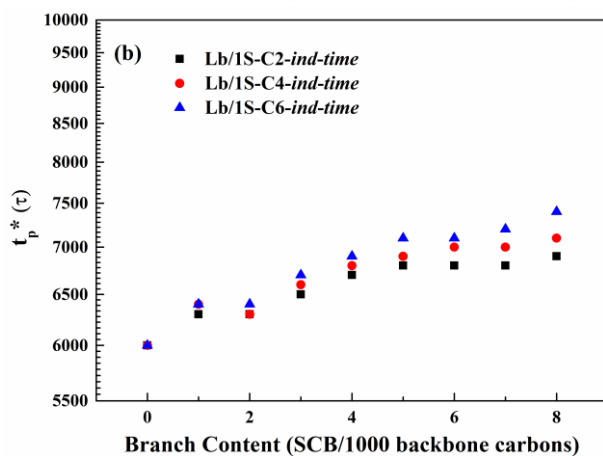

57

58 **Figure S2.** Branch length dependence of induction time ( $t_p^*$ ) for (a) L/1Sb systems and (b) Lb/1S systems.

59

60

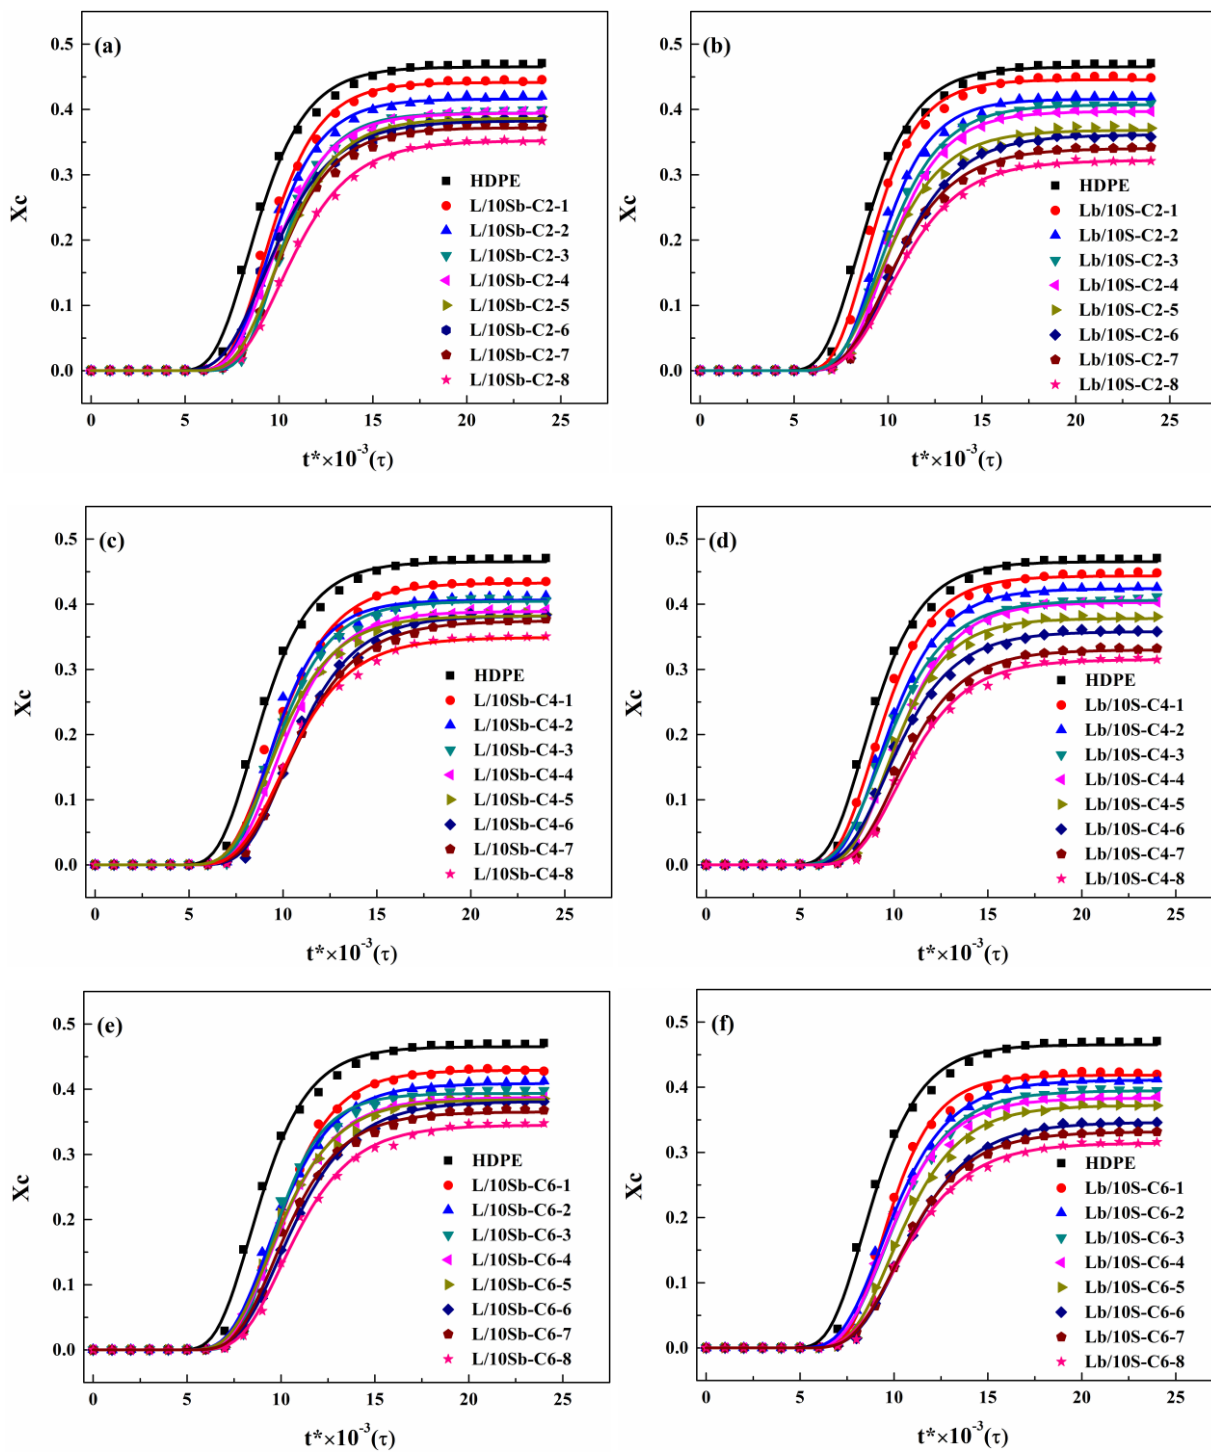

62 **Figure S3.** Crystallization curves of different branch content for (a) L/10Sb-C2, (b) Lb/10S-C2, (c) L/10Sb-

63 C4, (d) Lb/10S-C4, (e) L/10Sb-C6, (f) Lb/10S-C6 systems.

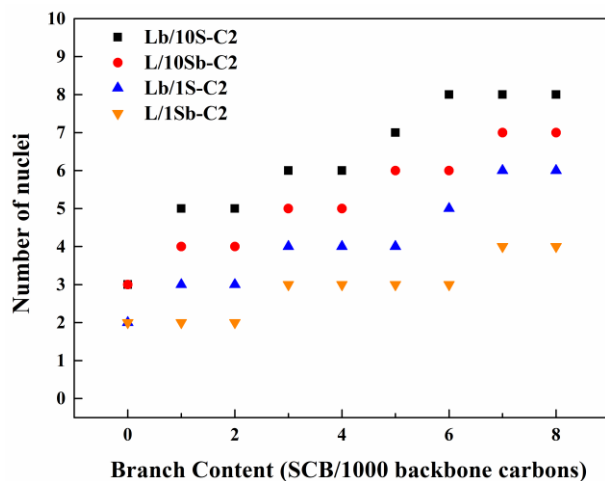

64

65 **Figure S4.** Number of nuclei of the ethyl branched complex BPE model chains and simple BPE model

66 chains at the end of the simulation.

67

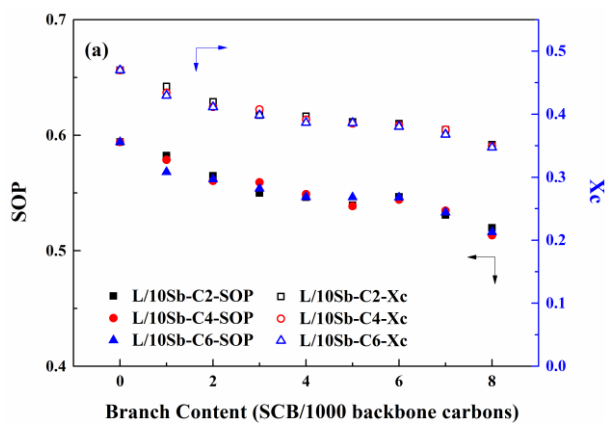

68

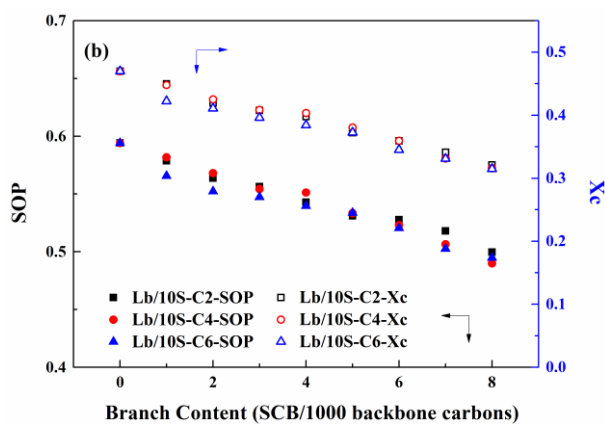

69

70 **Figure S5.** Branch length dependence of SOP and  $X_c$  for (a) L/10Sb systems and (b) Lb/10S systems.
